# Supplementary material for: Transcriptome differential expression analysis of defoliation of two different lemon varieties
Source: PeerJ. 2024 Apr 26;12:e17218. doi: 10.7717/peerj.17218 (PMC11057431; doi:10.7717/peerj.17218)
Supplement: Supplemental Information 4 [file peerj-12-17218-s004.xlsx]

## Sheet: Sheet1
TableS1 Abbreviation
Abbreviation	English name	notes
CQ	the predefoliation stage	Specific date: November 15, 2021
CZ	the middefoliation stage	Specific date: December 1, 2021
CH	the postdefoliation stage	Specific date: December 15, 2021
WGCNA	Weighted Gene Co-Expression Network Analysis
