# Supplementary material for: Transcriptome differential expression analysis of defoliation of two different lemon varieties
Source: PeerJ. 2024 Apr 26;12:e17218. doi: 10.7717/peerj.17218 (PMC11057431; doi:10.7717/peerj.17218)
Supplement: Supplemental Information 6 [file peerj-12-17218-s006.xlsx]

## Sheet: Sheet1
sample	ACQ_1	ACQ_2	ACQ_3	ACZ_1	ACZ_2	ACZ_3	ACH_1	ACH_2	ACH_3	YCQ_1	YCQ_2	YCQ_3	YCZ_1	YCZ_2	YCZ_3	YCH_1	YCH_2	YCH_3
raw_reads	45389670	43962366	44361426	45955674	43898930	45156658	43731580	44868396	46175892	47139164	46281504	44404670	47499598	43595010	45732154	46918934	44498312	41927840
raw_bases	6.81G	6.59G	6.65G	6.89G	6.58G	6.77G	6.56G	6.73G	6.93G	7.07G	6.94G	6.66G	7.12G	6.54G	6.86G	7.04G	6.67G	6.29G
clean_reads	43202906	41395116	42681106	42574728	41087228	42806154	42746268	42920522	44595350	45933828	43681180	42113050	46685856	41737704	44005962	45901630	42341522	39849322
clean_bases	6.48G	6.21G	6.4G	6.39G	6.16G	6.42G	6.41G	6.44G	6.69G	6.89G	6.55G	6.32G	7.0G	6.26G	6.6G	6.89G	6.35G	5.98G
error_rate	0.03	0.03	0.03	0.03	0.03	0.03	0.03	0.03	0.03	0.03	0.03	0.03	0.03	0.03	0.03	0.03	0.03	0.03
Q20	96.02	97.36	97.58	97.52	97.73	97.56	95.77	97.62	97.44	96.11	97.56	97.52	96.34	97.55	96.85	96.13	97.65	97.79
Q30	89.77	92.64	93.14	93	93.39	93.03	89.15	93.19	92.74	89.81	93.07	92.96	90.31	93.01	91.47	89.93	93.25	93.7
GC_pct	43.37	43.12	42.25	43.49	43.5	43.41	43.09	42.79	42.93	43.31	42.39	42.48	43.99	43.12	44.05	43.54	43.26	44.95
total_reads	43202906	41395116	42681106	42574728	41087228	42806154	42746268	42920522	44595350	45933828	43681180	42113050	46685856	41737704	44005962	45901630	42341522	39849322
total_map	36144885(83.66%)	33450174(80.81%)	35765162(83.8%)	36989230(86.88%)	35754881(87.02%)	37323752(87.19%)	36219818(84.73%)	36712274(85.54%)	38059126(85.34%)	39595137(86.2%)	37662531(86.22%)	36165422(85.88%)	36921295(79.08%)	33412437(80.05%)	36180101(82.22%)	38598212(84.09%)	35834006(84.63%)	31449796(78.92%)
unique_map	33679703(77.96%)	31320726(75.66%)	33420700(78.3%)	34404354(80.81%)	33247982(80.92%)	34705696(81.08%)	33715982(78.87%)	34109504(79.47%)	35362964(79.3%)	36655291(79.8%)	34931334(79.97%)	33663423(79.94%)	34468315(73.83%)	31140010(74.61%)	33649047(76.46%)	35842756(78.09%)	33173821(78.35%)	29098680(73.02%)
multi_map	2465182(5.71%)	2129448(5.14%)	2344462(5.49%)	2584876(6.07%)	2506899(6.1%)	2618056(6.12%)	2503836(5.86%)	2602770(6.06%)	2696162(6.05%)	2939846(6.4%)	2731197(6.25%)	2501999(5.94%)	2452980(5.25%)	2272427(5.44%)	2531054(5.75%)	2755456(6.0%)	2660185(6.28%)	2351116(5.9%)
read1_map	16977552(39.3%)	15749980(38.05%)	16757777(39.26%)	17248684(40.51%)	16670849(40.57%)	17419355(40.69%)	17034693(39.85%)	17107711(39.86%)	17755234(39.81%)	18416974(40.09%)	17511664(40.09%)	16908100(40.15%)	17334891(37.13%)	15650705(37.5%)	16904080(38.41%)	18076819(39.38%)	16623233(39.26%)	14540365(36.49%)
read2_map	16702151(38.66%)	15570746(37.61%)	16662923(39.04%)	17155670(40.3%)	16577133(40.35%)	17286341(40.38%)	16681289(39.02%)	17001793(39.61%)	17607730(39.48%)	18238317(39.71%)	17419670(39.88%)	16755323(39.79%)	17133424(36.7%)	15489305(37.11%)	16744967(38.05%)	17765937(38.7%)	16550588(39.09%)	14558315(36.53%)
positive_map	16845567(38.99%)	15657378(37.82%)	16707172(39.14%)	17184153(40.36%)	16609768(40.43%)	17338956(40.51%)	16838387(39.39%)	17040682(39.7%)	17669923(39.62%)	18312895(39.87%)	17451584(39.95%)	16826510(39.96%)	17215008(36.87%)	15557958(37.28%)	16809621(38.2%)	17896586(38.99%)	16563063(39.12%)	14533408(36.47%)
negative_map	16834136(38.97%)	15663348(37.84%)	16713528(39.16%)	17220201(40.45%)	16638214(40.49%)	17366740(40.57%)	16877595(39.48%)	17068822(39.77%)	17693041(39.67%)	18342396(39.93%)	17479750(40.02%)	16836913(39.98%)	17253307(36.96%)	15582052(37.33%)	16839426(38.27%)	17946170(39.1%)	16610758(39.23%)	14565272(36.55%)
splice_map	10435819(24.16%)	9341973(22.57%)	9350138(21.91%)	11187603(26.28%)	10821520(26.34%)	11293091(26.38%)	11348512(26.55%)	10957054(25.53%)	11590069(25.99%)	11274574(24.55%)	10378780(23.76%)	10411493(24.72%)	11512207(24.66%)	9819339(23.53%)	11571933(26.3%)	12272548(26.74%)	10684101(25.23%)	10143124(25.45%)
unsplice_map	23243884(53.8%)	21978753(53.1%)	24070562(56.4%)	23216751(54.53%)	22426462(54.58%)	23412605(54.69%)	22367470(52.33%)	23152450(53.94%)	23772895(53.31%)	25380717(55.25%)	24552554(56.21%)	23251930(55.21%)	22956108(49.17%)	21320671(51.08%)	22077114(50.17%)	23570208(51.35%)	22489720(53.12%)	18955556(47.57%)
proper_map	30911108(71.55%)	28797368(69.57%)	31196688(73.09%)	31534236(74.07%)	30588478(74.45%)	31937954(74.61%)	31079950(72.71%)	31672006(73.79%)	32023776(71.81%)	33894710(73.79%)	32622024(74.68%)	30725498(72.96%)	31677150(67.85%)	28377538(67.99%)	31158360(70.8%)	33155566(72.23%)	31114930(73.49%)	27140760(68.11%)
