# Supplementary material for: Transcriptome differential expression analysis of defoliation of two different lemon varieties
Source: PeerJ. 2024 Apr 26;12:e17218. doi: 10.7717/peerj.17218 (PMC11057431; doi:10.7717/peerj.17218)
Supplement: Supplemental Information 8 [file peerj-12-17218-s008.xlsx]

## Sheet: Sheet1
Gene_id	Sample	Ct(Actin)	Ct(gene)	Mean Ct(Actin)	Mean Ct(gene)	△Ct	CK mean(△Ct)	△△Ct	2-△△Ct	mean(2-△△Ct)	stdev(2-△△Ct)
CL9G066930012_alt	ACh_3A_1	31.1954	33.2697
CL9G066930012_alt	ACh_3A_2	31.0406	31.9926
CL9G066930012_alt	ACh_3A_3	31.4719	31.5437	31.236	32.2686	1.03269		7.64815	0.00498515
CL9G066930012_alt	ACh_C3_1	30.2458	28.2151
CL9G066930012_alt	ACh_C3_2	30.1403	27.2167
CL9G066930012_alt	ACh_C3_3	30.6697	27.5954	30.352	27.6757	-2.67623		3.93923	0.0651887
CL9G066930012_alt	ACh_C4_1	29.3887	27.9441
CL9G066930012_alt	ACh_C4_2	30.4475	28.1848
CL9G066930012_alt	ACh_C4_3	30.4409	27.667	30.0924	27.932	-2.16041		4.45505	0.0455927	0.0385888	0.0273982
CL9G066930012_alt	ACq_1A_1	29.4697	26.4375
CL9G066930012_alt	ACq_1A_2	29.876	26.7375
CL9G066930012_alt	ACq_1A_3	30.2563	26.9399	29.8674	26.705	-3.1624		3.45306	0.0913112
CL9G066930012_alt	ACq_C1_1	30.861	22.2982
CL9G066930012_alt	ACq_C1_2	30.1418	22.1759
CL9G066930012_alt	ACq_C1_3	29.7381	22.2576	30.247	22.2439	-8.00312		-1.38766	2.61654
CL9G066930012_alt	ACq_C2_1	28.8104	21.2574
CL9G066930012_alt	ACq_C2_2	30.1692	21.0608
CL9G066930012_alt	ACq_C2_3	30.3652	20.984	29.7816	21.1007	-8.68086	-6.61546	-2.0654	4.18551	2.29779	1.76731
CL9G066930012_alt	ACzb_19A_1	29.9768	29.2236
CL9G066930012_alt	ACzb_19A_2	29.8377	29.7414
CL9G066930012_alt	ACzb_19A_3	30.2824	28.7252	30.0323	29.2301	-0.802206		5.81325	0.0177843
CL9G066930012_alt	ACz_D2_1	31.058	28.4633
CL9G066930012_alt	ACz_D2_2	30.546	28.6876
CL9G066930012_alt	ACz_D2_3	29.4305	29.1673	30.3448	28.7728	-1.57204		5.04342	0.0303236
CL9G066930012_alt	ACzb_20A_1	29.474	28.6645
CL9G066930012_alt	ACzb_20A_2	29.2709	27.8377
CL9G066930012_alt	ACzb_20A_3	28.9557	27.7605	29.2335	28.0876	-1.14599		5.46947	0.0225696	0.0235592	0.0111396
CL9G066930012_alt	YCh_6A_1	29.6202	31.4007
CL9G066930012_alt	YCh_6A_2	30.7937	30.8043
CL9G066930012_alt	YCh_6A_3	31.133	34.0993	30.5156	32.1014	1.5858		4.8044	0.0357875
CL9G066930012_alt	YCh_C10_1	29.1465	26.7547
CL9G066930012_alt	YCh_C10_2	29.0399	26.6175
CL9G066930012_alt	YCh_C10_3	29.0971	26.6198	29.0945	26.664	-2.43051		0.788089	0.579111
CL9G066930012_alt	YCh_C9_1	29.8201	27.2712
CL9G066930012_alt	YCh_C9_2	29.9766	27.6426
CL9G066930012_alt	YCh_C9_3	29.4286	28.0776	29.7418	27.6638	-2.07797		1.14063	0.453562	0.356153	0.253459
CL9G066930012_alt	YCq_4A_1	29.542	33.1178
CL9G066930012_alt	YCq_4A_2	30.045	30.5855
CL9G066930012_alt	YCq_4A_3	30.1321	30.5334	29.9064	31.4122	1.50587		4.72447	0.0378263
CL9G066930012_alt	YCq_C5_1	30.1252	22.9718
CL9G066930012_alt	YCq_C5_2	28.9641	22.9593
CL9G066930012_alt	YCq_C5_3	29.3703	22.8828	29.4865	22.938	-6.54857		-3.32997	10.0559
CL9G066930012_alt	YCq_C6_1	30.2825	22.3147
CL9G066930012_alt	YCq_C6_2	29.9168	22.2525
CL9G066930012_alt	YCq_C6_3	30.0825	22.2195	30.0939	22.2622	-7.8317	-3.2186	-4.6131	24.4727	11.5221	10.0166
CL9G066930012_alt	YCz_5A_1	32.7659	29.6369
CL9G066930012_alt	YCz_5A_2	33.1207	29.9434
CL9G066930012_alt	YCz_5A_3	33.1256	30.1965	33.0041	29.9256	-3.07847		0.140136	0.907434
CL9G066930012_alt	YCz_C7_1	30.5189	27.723
CL9G066930012_alt	YCz_C7_2	31.1176	27.8675
CL9G066930012_alt	YCz_C7_3	30.1005	27.3121	30.579	27.6342	-2.94479		0.27381	0.827133
CL9G066930012_alt	YCz_C8_1	29.4477	26.2364
CL9G066930012_alt	YCz_C8_2	29.7164	26.6823
CL9G066930012_alt	YCz_C8_3	30.2273	26.5665	29.7971	26.4951	-3.30208		-0.0834809	1.05957	0.931379	0.411848
CL2G044126012_alt	ACh_3A_1	31.1954	28.2542
CL2G044126012_alt	ACh_3A_2	31.0406	22.2333
CL2G044126012_alt	ACh_3A_3	31.4719	22.6484	31.236	24.3786	-6.85736		-0.241895	1.18255
CL2G044126012_alt	ACh_C3_1	30.2458	25.8531
CL2G044126012_alt	ACh_C3_2	30.1403	25.8707
CL2G044126012_alt	ACh_C3_3	30.6697	25.4744	30.352	25.7328	-4.61922		1.99624	0.250652
CL2G044126012_alt	ACh_C4_1	29.3887	25.8748
CL2G044126012_alt	ACh_C4_2	30.4475	26.3005
CL2G044126012_alt	ACh_C4_3	30.4409	25.6254	30.0924	25.9336	-4.15881		2.45665	0.182169	0.538455	0.458823
CL2G044126012_alt	ACq_1A_1	29.4697	27.1231
CL2G044126012_alt	ACq_1A_2	29.876	27.3
CL2G044126012_alt	ACq_1A_3	30.2563	26.7667	29.8674	27.0633	-2.80405		3.81141	0.0712282
CL2G044126012_alt	ACq_C1_1	30.861	21.0815
CL2G044126012_alt	ACq_C1_2	30.1418	21.0359
CL2G044126012_alt	ACq_C1_3	29.7381	21.2842	30.247	21.1339	-9.1131		-2.49764	5.64762
CL2G044126012_alt	ACq_C2_1	28.8104	19.2678
CL2G044126012_alt	ACq_C2_2	30.1692	19.4103
CL2G044126012_alt	ACq_C2_3	30.3652	19.2929	29.7816	19.3237	-10.4579	-7.45837	-3.84249	14.3451	6.68798	5.85325
CL2G044126012_alt	ACzb_19A_1	29.9768	26.5839
CL2G044126012_alt	ACzb_19A_2	29.8377	28.2129
CL2G044126012_alt	ACzb_19A_3	30.2824	23.5598	30.0323	26.1189	-3.91343		2.70203	0.153677
CL2G044126012_alt	ACz_D2_1	31.058	25.8888
CL2G044126012_alt	ACz_D2_2	30.546	25.3472
CL2G044126012_alt	ACz_D2_3	29.4305	25.1123	30.3448	25.4494	-4.89536		1.7201	0.303528
CL2G044126012_alt	ACzb_20A_1	29.474	24.0988
CL2G044126012_alt	ACzb_20A_2	29.2709	25.5188
CL2G044126012_alt	ACzb_20A_3	28.9557	25.6421	29.2335	25.0866	-4.14698		2.46848	0.180682	0.212629	0.108012
CL2G044126012_alt	YCh_6A_1	29.6202	27.2213
CL2G044126012_alt	YCh_6A_2	30.7937	23.184
CL2G044126012_alt	YCh_6A_3	31.133	24.9014	30.5156	25.1023	-5.41338		-2.19478	4.5782
CL2G044126012_alt	YCh_C10_1	29.1465	25.3136
CL2G044126012_alt	YCh_C10_2	29.0399	25.1442
CL2G044126012_alt	YCh_C10_3	29.0971	25.2743	29.0945	25.244	-3.8505		-0.631894	1.5496
CL2G044126012_alt	YCh_C9_1	29.8201	24.9571
CL2G044126012_alt	YCh_C9_2	29.9766	25.8499
CL2G044126012_alt	YCh_C9_3	29.4286	25.5825	29.7418	25.4631	-4.27861		-1.06001	2.08495	2.73758	1.64666
CL2G044126012_alt	YCq_4A_1	29.542	27.7982
CL2G044126012_alt	YCq_4A_2	30.045	28.5943
CL2G044126012_alt	YCq_4A_3	30.1321	25.8754	29.9064	27.4226	-2.48374		0.734861	0.600876
CL2G044126012_alt	YCq_C5_1	30.1252	20.5708
CL2G044126012_alt	YCq_C5_2	28.9641	20.9506
CL2G044126012_alt	YCq_C5_3	29.3703	20.6492	29.4865	20.7235	-8.763		-5.54439	46.6691
CL2G044126012_alt	YCq_C6_1	30.2825	21.4625
CL2G044126012_alt	YCq_C6_2	29.9168	21.4465
CL2G044126012_alt	YCq_C6_3	30.0825	21.3501	30.0939	21.4197	-8.67424	-4.98025	-5.45564	43.8845	30.3848	22.5107
CL2G044126012_alt	YCz_5A_1	32.7659	27.1548
CL2G044126012_alt	YCz_5A_2	33.1207	22.4824
CL2G044126012_alt	YCz_5A_3	33.1256	24.2489	33.0041	24.6287	-8.37534		-5.15674	35.6725
CL2G044126012_alt	YCz_C7_1	30.5189	25.8979
CL2G044126012_alt	YCz_C7_2	31.1176	25.9928
CL2G044126012_alt	YCz_C7_3	30.1005	25.777	30.579	25.8892	-4.68976		-1.47115	2.77243
CL2G044126012_alt	YCz_C8_1	29.4477	24.1273
CL2G044126012_alt	YCz_C8_2	29.7164	24.0344
CL2G044126012_alt	YCz_C8_3	30.2273	23.807	29.7971	23.9896	-5.80757		-2.58897	6.01668	14.8205	14.3371
CL2G044587012_alt	ACh_3A_1	31.1954	31.1814
CL2G044587012_alt	ACh_3A_2	31.0406	31.1082
CL2G044587012_alt	ACh_3A_3	31.4719	29.9923	31.236	30.7606	-0.475314		-0.475314	1.39022
CL2G044587012_alt	ACh_C3_1	30.2458	27.8473
CL2G044587012_alt	ACh_C3_2	30.1403	27.8256
CL2G044587012_alt	ACh_C3_3	30.6697	27.6529	30.352	27.7753	-2.57668		-2.57668	5.96567
CL2G044587012_alt	ACh_C4_1	29.3887	28.3205
CL2G044587012_alt	ACh_C4_2	30.4475	27.9507
CL2G044587012_alt	ACh_C4_3	30.4409	28.1954	30.0924	28.1555	-1.93682		-1.93682	3.82861	3.72817	2.2862
CL2G044587012_alt	ACq_1A_1	29.4697	28.2954
CL2G044587012_alt	ACq_1A_2	29.876	28.3793
CL2G044587012_alt	ACq_1A_3	30.2563	28.2365	29.8674	28.3037	-1.56364		-1.56364	2.95598
CL2G044587012_alt	ACq_C1_1	30.861	26.2509
CL2G044587012_alt	ACq_C1_2	30.1418	26.108
CL2G044587012_alt	ACq_C1_3	29.7381	26.0379	30.247	26.1323	-4.11469		-4.11469	17.3239
CL2G044587012_alt	ACq_C2_1	28.8104	24.8677
CL2G044587012_alt	ACq_C2_2	30.1692	24.8547
CL2G044587012_alt	ACq_C2_3	30.3652	24.7664	29.7816	24.8296	-4.95199	-3.54344	-4.95199	30.9527	17.0775	12.3565
CL2G044587012_alt	ACzb_19A_1	29.9768	27.7325
CL2G044587012_alt	ACzb_19A_2	29.8377	27.1047
CL2G044587012_alt	ACzb_19A_3	30.2824	27.2424	30.0323	27.3599	-2.67241		-2.67241	6.37495
CL2G044587012_alt	ACz_D2_1	31.058	29.2827
CL2G044587012_alt	ACz_D2_2	30.546	29.5898
CL2G044587012_alt	ACz_D2_3	29.4305	29.4881	30.3448	29.4536	-0.891243		-0.891243	1.85477
CL2G044587012_alt	ACzb_20A_1	29.474	27.07
CL2G044587012_alt	ACzb_20A_2	29.2709	27.2263
CL2G044587012_alt	ACzb_20A_3	28.9557	27.9613	29.2335	27.4192	-1.81437		-1.81437	3.51706	3.91559	2.34271
CL2G044587012_alt	YCh_6A_1	29.6202	29.0984
CL2G044587012_alt	YCh_6A_2	30.7937	29.0517
CL2G044587012_alt	YCh_6A_3	31.133	28.9199	30.5156	29.0233	-1.49231		-1.49231	2.81339
CL2G044587012_alt	YCh_C10_1	29.1465	26.42
CL2G044587012_alt	YCh_C10_2	29.0399	26.4176
CL2G044587012_alt	YCh_C10_3	29.0971	26.2654	29.0945	26.3677	-2.72684		-2.72684	6.62003
CL2G044587012_alt	YCh_C9_1	29.8201	27.4921
CL2G044587012_alt	YCh_C9_2	29.9766	27.4159
CL2G044587012_alt	YCh_C9_3	29.4286	27.6128	29.7418	27.5069	-2.23482		-2.23482	4.70702	4.71348	2.44479
CL2G044587012_alt	YCq_4A_1	29.542	28.8578
CL2G044587012_alt	YCq_4A_2	30.045	29.1818
CL2G044587012_alt	YCq_4A_3	30.1321	28.212	29.9064	28.7505	-1.15586		-1.15586	2.22816
CL2G044587012_alt	YCq_C5_1	30.1252	25.69
CL2G044587012_alt	YCq_C5_2	28.9641	25.5466
CL2G044587012_alt	YCq_C5_3	29.3703	25.9742	29.4865	25.737	-3.74959		-3.74959	13.4505
CL2G044587012_alt	YCq_C6_1	30.2825	25.345
CL2G044587012_alt	YCq_C6_2	29.9168	25.3781
CL2G044587012_alt	YCq_C6_3	30.0825	25.3752	30.0939	25.3661	-4.72786	-2.40833	-4.72786	26.4989	14.0592	10.5278
CL2G044587012_alt	YCz_5A_1	32.7659	28.5467
CL2G044587012_alt	YCz_5A_2	33.1207	29.275
CL2G044587012_alt	YCz_5A_3	33.1256	28.0876	33.0041	28.6364	-4.36765		-4.36765	20.6439
CL2G044587012_alt	YCz_C7_1	30.5189	27.6527
CL2G044587012_alt	YCz_C7_2	31.1176	27.5184
CL2G044587012_alt	YCz_C7_3	30.1005	27.5917	30.579	27.5876	-2.99139		-2.99139	7.95238
CL2G044587012_alt	YCz_C8_1	29.4477	28.165
CL2G044587012_alt	YCz_C8_2	29.7164	28.2772
CL2G044587012_alt	YCz_C8_3	30.2273	27.8927	29.7971	28.1116	-1.6855		-1.6855	3.21653	10.6043	7.85405
CL3G046634012_alt	ACh_3A_1	31.1954	33.3141
CL3G046634012_alt	ACh_3A_2	31.0406	32.3015
CL3G046634012_alt	ACh_3A_3	31.4719	32.7114	31.236	32.7757	1.53972		1.53972	0.343952
CL3G046634012_alt	ACh_C3_1	30.2458	29.4008
CL3G046634012_alt	ACh_C3_2	30.1403	29.0492
CL3G046634012_alt	ACh_C3_3	30.6697	30.2283	30.352	29.5594	-0.792554		-0.792554	1.73214
CL3G046634012_alt	ACh_C4_1	29.3887	31.7495
CL3G046634012_alt	ACh_C4_2	30.4475	32.2103
CL3G046634012_alt	ACh_C4_3	30.4409	31.5084	30.0924	31.8228	1.73039		1.73039	0.301371	0.792487	0.67014
CL3G046634012_alt	ACq_1A_1	29.4697	28.9304
CL3G046634012_alt	ACq_1A_2	29.876	28.435
CL3G046634012_alt	ACq_1A_3	30.2563	28.4454	29.8674	28.6036	-1.26377		-1.26377	2.40123
CL3G046634012_alt	ACq_C1_1	30.861	23.2278
CL3G046634012_alt	ACq_C1_2	30.1418	23.2894
CL3G046634012_alt	ACq_C1_3	29.7381	23.4153	30.247	23.3108	-6.93615		-6.93615	122.458
CL3G046634012_alt	ACq_C2_1	28.8104	23.5183
CL3G046634012_alt	ACq_C2_2	30.1692	23.7325
CL3G046634012_alt	ACq_C2_3	30.3652	22.3137	29.7816	23.1882	-6.59343	-4.93112	-6.59343	96.5654	73.8083	54.9305
CL3G046634012_alt	ACzb_19A_1	29.9768	31.0199
CL3G046634012_alt	ACzb_19A_2	29.8377	30.8841
CL3G046634012_alt	ACzb_19A_3	30.2824	30.2203	30.0323	30.7081	0.675821		0.675821	0.625976
CL3G046634012_alt	ACz_D2_1	31.058	29.989
CL3G046634012_alt	ACz_D2_2	30.546	28.9006
CL3G046634012_alt	ACz_D2_3	29.4305	29.5575	30.3448	29.4824	-0.862427		-0.862427	1.81809
CL3G046634012_alt	ACzb_20A_1	29.474	28.5006
CL3G046634012_alt	ACzb_20A_2	29.2709	30.4464
CL3G046634012_alt	ACzb_20A_3	28.9557	33.37	29.2335	30.7723	1.5388		1.5388	0.344171	0.929414	0.684141
CL3G046634012_alt	YCh_6A_1	29.6202	32.4585
CL3G046634012_alt	YCh_6A_2	30.7937	36.0628
CL3G046634012_alt	YCh_6A_3	31.133	32.1204	30.5156	33.5472	3.03159		3.03159	0.122292
CL3G046634012_alt	YCh_C10_1	29.1465	30.689
CL3G046634012_alt	YCh_C10_2	29.0399	30.1442
CL3G046634012_alt	YCh_C10_3	29.0971	31.2668	29.0945	30.7	1.60552		1.60552	0.328618
CL3G046634012_alt	YCh_C9_1	29.8201	29.5298
CL3G046634012_alt	YCh_C9_2	29.9766	29.5404
CL3G046634012_alt	YCh_C9_3	29.4286	29.4544	29.7418	29.5082	-0.233558		-0.233558	1.17573	0.542214	0.459293
CL3G046634012_alt	YCq_4A_1	29.542	32.0093
CL3G046634012_alt	YCq_4A_2	30.045	32.8785
CL3G046634012_alt	YCq_4A_3	30.1321	32.4157	29.9064	32.4345	2.52817		2.52817	0.173359
CL3G046634012_alt	YCq_C5_1	30.1252	24.9194
CL3G046634012_alt	YCq_C5_2	28.9641	25.2029
CL3G046634012_alt	YCq_C5_3	29.3703	25.1656	29.4865	25.096	-4.39059		-4.39059	20.9749
CL3G046634012_alt	YCq_C6_1	30.2825	24.8816
CL3G046634012_alt	YCq_C6_2	29.9168	25.039
CL3G046634012_alt	YCq_C6_3	30.0825	25.0985	30.0939	25.0064	-5.08757	-1.7375	-5.08757	34.0026	18.3836	14.4547
CL3G046634012_alt	YCz_5A_1	32.7659	33.4985
CL3G046634012_alt	YCz_5A_2	33.1207	32.7212
CL3G046634012_alt	YCz_5A_3	33.1256	32.726	33.0041	32.9819	-0.0221365		-0.0221365	1.01546
CL3G046634012_alt	YCz_C7_1	30.5189	28.9469
CL3G046634012_alt	YCz_C7_2	31.1176	29.3319
CL3G046634012_alt	YCz_C7_3	30.1005	29.3494	30.579	29.2094	-1.36958		-1.36958	2.58396
CL3G046634012_alt	YCz_C8_1	29.4477	26.5072
CL3G046634012_alt	YCz_C8_2	29.7164	27.1928
CL3G046634012_alt	YCz_C8_3	30.2273	27.3402	29.7971	27.0134	-2.78376		-2.78376	6.88645	3.49529	2.62882
CL8G065380012_alt	ACh_3A_1	31.1954	33.7843
CL8G065380012_alt	ACh_3A_2	31.0406	33.3209
CL8G065380012_alt	ACh_3A_3	31.4719	36.2138	31.236	34.4396	3.20368		3.20368	0.108541
CL8G065380012_alt	ACh_C3_1	30.2458	22.0692
CL8G065380012_alt	ACh_C3_2	30.1403	22.0174
CL8G065380012_alt	ACh_C3_3	30.6697	21.9074	30.352	21.998	-8.35399		-8.35399	327.19
CL8G065380012_alt	ACh_C4_1	29.3887	22.7203
CL8G065380012_alt	ACh_C4_2	30.4475	22.5508
CL8G065380012_alt	ACh_C4_3	30.4409	22.5999	30.0924	22.6237	-7.46868		-7.46868	177.132	168.143	136.763
CL8G065380012_alt	ACq_1A_1	29.4697	30.5397
CL8G065380012_alt	ACq_1A_2	29.876	31.8875
CL8G065380012_alt	ACq_1A_3	30.2563	30.7965	29.8674	31.0746	1.20723		1.20723	0.433098
CL8G065380012_alt	ACq_C1_1	30.861	26.2923
CL8G065380012_alt	ACq_C1_2	30.1418	26.3061
CL8G065380012_alt	ACq_C1_3	29.7381	26.324	30.247	26.3075	-3.93952		-3.93952	15.3431
CL8G065380012_alt	ACq_C2_1	28.8104	24.665
CL8G065380012_alt	ACq_C2_2	30.1692	24.5627
CL8G065380012_alt	ACq_C2_3	30.3652	24.5054	29.7816	24.5777	-5.20387	-2.64539	-5.20387	36.8572	17.5445	15.0123
CL8G065380012_alt	ACzb_19A_1	29.9768	29.2653
CL8G065380012_alt	ACzb_19A_2	29.8377	29.2122
CL8G065380012_alt	ACzb_19A_3	30.2824	29.4103	30.0323	29.2959	-0.736385		-0.736385	1.666
CL8G065380012_alt	ACz_D2_1	31.058	27.3775
CL8G065380012_alt	ACz_D2_2	30.546	27.3003
CL8G065380012_alt	ACz_D2_3	29.4305	27.5328	30.3448	27.4035	-2.94126		-2.94126	7.68084
CL8G065380012_alt	ACzb_20A_1	29.474	29.151
CL8G065380012_alt	ACzb_20A_2	29.2709	29.5324
CL8G065380012_alt	ACzb_20A_3	28.9557	29.2109	29.2335	29.2981	0.0645445		0.0645445	0.956247	3.43436	3.00611
CL8G065380012_alt	YCh_6A_1	29.6202	32.3031
CL8G065380012_alt	YCh_6A_2	30.7937	32.471
CL8G065380012_alt	YCh_6A_3	31.133	32.1332	30.5156	32.3025	1.78682		1.78682	0.289811
CL8G065380012_alt	YCh_C10_1	29.1465	22.9588
CL8G065380012_alt	YCh_C10_2	29.0399	22.5908
CL8G065380012_alt	YCh_C10_3	29.0971	22.9563	29.0945	22.8353	-6.2592		-6.2592	76.5961
CL8G065380012_alt	YCh_C9_1	29.8201	23.6073
CL8G065380012_alt	YCh_C9_2	29.9766	23.6296
CL8G065380012_alt	YCh_C9_3	29.4286	23.5984	29.7418	23.6118	-6.12999		-6.12999	70.0345	48.9735	36.6588
CL8G065380012_alt	YCq_4A_1	29.542	32.0594
CL8G065380012_alt	YCq_4A_2	30.045	32.365
CL8G065380012_alt	YCq_4A_3	30.1321	31.9366	29.9064	32.1203	2.21395		2.21395	0.215543
CL8G065380012_alt	YCq_C5_1	30.1252	25.1471
CL8G065380012_alt	YCq_C5_2	28.9641	25.0672
CL8G065380012_alt	YCq_C5_3	29.3703	25.1095	29.4865	25.108	-4.37859		-4.37859	20.8011
CL8G065380012_alt	YCq_C6_1	30.2825	26.6272
CL8G065380012_alt	YCq_C6_2	29.9168	26.4385
CL8G065380012_alt	YCq_C6_3	30.0825	26.2444	30.0939	26.4367	-3.65721	-1.45546	-3.65721	12.6163	11.211	8.79074
CL8G065380012_alt	YCz_5A_1	32.7659	29.4398
CL8G065380012_alt	YCz_5A_2	33.1207	29.6947
CL8G065380012_alt	YCz_5A_3	33.1256	29.5622	33.0041	29.5656	-3.4385		-3.4385	10.8415
CL8G065380012_alt	YCz_C7_1	30.5189	24.9305
CL8G065380012_alt	YCz_C7_2	31.1176	24.8796
CL8G065380012_alt	YCz_C7_3	30.1005	24.7404	30.579	24.8501	-5.72884		-5.72884	53.0337
CL8G065380012_alt	YCz_C8_1	29.4477	25.6608
CL8G065380012_alt	YCz_C8_2	29.7164	25.6335
CL8G065380012_alt	YCz_C8_3	30.2273	25.5501	29.7971	25.6148	-4.18236		-4.18236	18.1558	27.3437	19.8587
